# Supplementary material for: Novel α-arylnitriles synthesis via Ni-catalyzed cross-coupling of α-bromonitriles with arylboronic acids under mild conditions
Source: Royal Society of Chemistry journal article supplement (doi:10.1039/c1ob05326d), 2011-01-01

# Novel $\alpha$ -Arylnitriles Synthesis via Ni-Catalyzed Cross-coupling of $\alpha$ -Bromonitriles with Arylboronic Acids under Mild Conditions

Yingying Yang,<sup>a</sup> Shan Tang,<sup>a</sup> Chao Liu,<sup>a</sup> Huimin Zhang,<sup>a</sup> Zhexun Sun,<sup>a</sup> and  
Aiwen Lei\*<sup>a,b</sup>

<sup>a</sup>College of Chemistry and Molecular Science, Wuhan University, Wuhan, 430072, P. R. China

<sup>b</sup>State Key Laboratory for Oxo Synthesis and Selective Oxidation, Lanzhou Institute of Chemical Physics, Chinese  
Academy of Sciences, 730000 Lanzhou

[aiwenlei@whu.edu.cn](mailto:aiwenlei@whu.edu.cn)

## Table of Contents

|                                                                                                      |            |
|------------------------------------------------------------------------------------------------------|------------|
| <b>1. General methods.....</b>                                                                       | <b>S2</b>  |
| <b>2. General procedure for the arylation of <math>\alpha</math>-bromonitrile<br/>compounds.....</b> | <b>S2</b>  |
| <b>3. Data for Figure 2.....</b>                                                                     | <b>S3</b>  |
| <b>3. Analytical data.....</b>                                                                       | <b>S4</b>  |
| <b>4. References.....</b>                                                                            | <b>S10</b> |
| <b>5. NMR spectra for new compounds.....</b>                                                         | <b>S11</b> |

## 1. General Methods

All reactions and manipulations were performed in a nitrogen-filled glove box or using standard Schlenk techniques, Column chromatography was performed using EM silica gel 60 (230-400 mesh).  $^1\text{H}$  NMR and  $^{13}\text{C}$  NMR were recorded on Mercury 300 MHz. GC-MS spectra were recorded on a Varian GC-MS 3900-2100T. All  $^1\text{H}$  NMR experiments were reported in parts per million (ppm) downfield of TMS. All  $^{13}\text{C}$  NMR spectra were reported in ppm and were obtained with  $^1\text{H}$  decoupling. Gas chromatographic analyses were performed on Varian GC 2000 gas chromatography instrument with a FID detector and naphthalene was added as internal standard. HRMS was recorded on MicroMass GC-TOF (EI). Unless otherwise noted, all chemicals were obtained directly from commercial source.  $\text{K}_3\text{PO}_4$  was obtained by the oven dry of  $\text{K}_3\text{PO}_4 \cdot 3\text{H}_2\text{O}$  at  $600\text{ }^\circ\text{C}$  overnight. 2-Bromobutanenitrile and 2-bromopentanenitrile were obtained following the literature procedure from the corresponding commercially available 2-bromocarboxylic acids.<sup>1-3</sup> Ethyl 2-(5,5-dimethyl-1,3,2-dioxaborinan-2-yl)benzoate was obtained following the literature report.<sup>4</sup>

## 2. General procedure for the arylation of $\alpha$ -Bromonitrile compounds

**Method A** In a glove box, 1.0 mmol  $\text{ArB}(\text{OH})_2$ , 0.05 mmol  $\text{Ni}(\text{PPh}_3)_4$  and 2.0 mmol  $\text{K}_3\text{PO}_4$  are combined in a schlenk tube. The tube was fitted with a rubber septum and removed from the glove box. Then the tube was backfilled with Nitrogen, 0.5 mmol  $\alpha$ -bromonitrile and 2 mL toluene were injected in the tube. The resulting solution kept stirring for 3 h at  $80\text{ }^\circ\text{C}$ , and then the suspension solution was diluted by ethyl acetate (3\*5 mL), the organic layers were combined, and dried over sodium sulfate. The pure product was obtained by flash column chromatography.

**Method B** In a glove box (as  $\text{K}_3\text{PO}_4$  is quite deliquescent under air condition, it is stored in the glovebox), 1.0 mmol  $\text{ArB}(\text{OH})_2$ , 0.025mmol  $\text{Ni}(\text{acac})_2$ , 0.05 mmol  $\text{PPh}_3$  and 3.0 mmol  $\text{K}_3\text{PO}_4$  (636.9 mg, 3.0 mmol) are combined in a schlenk tube. The tube

was fitted with a rubber septum and removed from the glove box. Then the tube was backfilled with Nitrogen, 0.5 mmol  $\alpha$ -bromonitrile and 1 ml toluene were injected in the tube. The resulting solution kept stirring for 3 h at 80 °C, and then the suspension solution was diluted by ethyl acetate (3\*5 mL), the organic layers were combined, and dried over sodium sulfate. The pure product was obtained by flash column chromatography.

### 3. Data for Figure 2.

| Effect of PPh <sub>3</sub> | Ni(acac) <sub>2</sub> : PPh <sub>3</sub> (5 mol% Ni(acac) <sub>2</sub> ) |     |     |     |     | Reaction time |
|----------------------------|--------------------------------------------------------------------------|-----|-----|-----|-----|---------------|
|                            | 1:0                                                                      | 1:1 | 1:2 | 1:3 | 1:4 |               |
| GC Yield [%]               | 28                                                                       | 46  | 61  | 49  | 48  | 0.5 h         |
|                            | 48                                                                       | 61  | 88  | 68  | 82  | 1 h           |
|                            | 76                                                                       | 76  | 90  | 83  | 90  | 2 h           |
|                            | 81                                                                       | 79  | 90  | 84  | 90  | 4 h           |
|                            | 83                                                                       | 80  | 90  | 84  | 90  | 8 h           |
|                            | 84                                                                       | 81  | 91  | 90  | 90  | 25 h          |

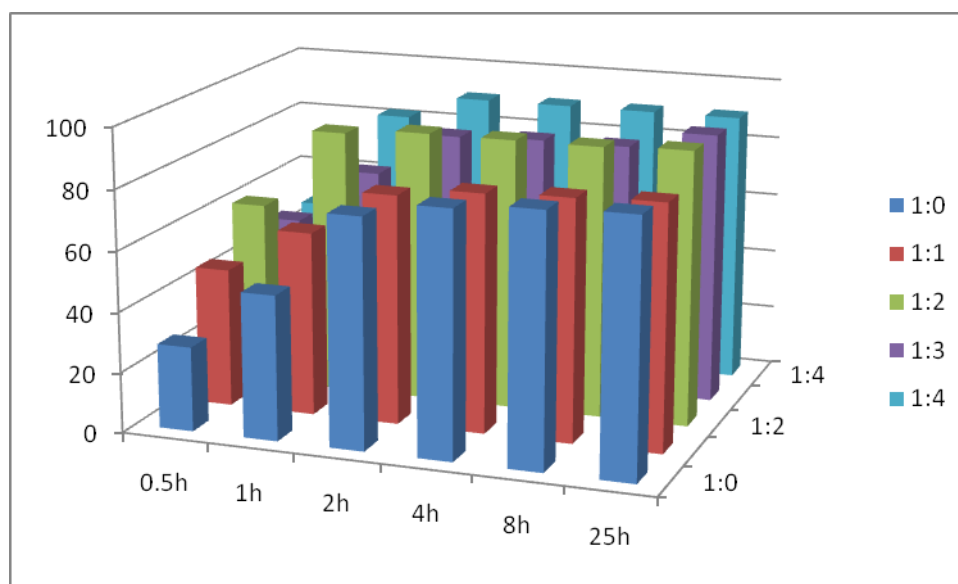

## 4. Analytical data

**Table 1**

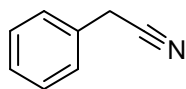

**2-phenylacetonitrile (Table 1, Entry 1)**<sup>5</sup> Method A was followed using PhB(OH)<sub>2</sub> (121.9 mg, 1.0 mmol), 2-bromoacetonitrile (60 mg, 0.5 mmol), Ni(PPh<sub>3</sub>)<sub>4</sub> (55.4 mg, 0.05 mmol), K<sub>3</sub>PO<sub>4</sub> (424.6 mg, 2.0 mmol). The GC yield was 67%. MS (EI) m/z: 128.0, 117.0, 89.0, 45.1.

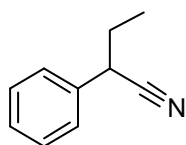

**2-phenylbutanenitrile (Table 1, Entry 2)**<sup>6</sup> Method A was followed using PhB(OH)<sub>2</sub> (121.9 mg, 1.0 mmol), 2-bromobutanenitrile (74mg, 0.5 mmol), Ni(PPh<sub>3</sub>)<sub>4</sub> (55.4 mg, 0.05 mmol), K<sub>3</sub>PO<sub>4</sub> (424.6 mg, 2.0 mmol). The reaction mixture was purified by silica gel chromatography to afford 76% of the desired product. <sup>1</sup>H NMR (300 MHz, CDCl<sub>3</sub>) δ 7.49 – 7.26 (m, 5H), 3.74 (t, *J* = 7.2 Hz, 1H), 2.00 - 1.88 (m, 2H), 1.08 (t, *J* = 7.4 Hz, 3H); <sup>13</sup>C NMR (75 MHz, CDCl<sub>3</sub>) δ 135.98, 129.25, 128.24, 127.53, 121.03, 39.13, 29.47, 11.73. MS (EI) m/z: 144.8, 116.9, 89.0, 63.0.

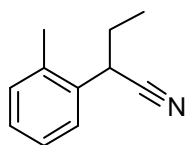

**2-*o*-tolylbutanenitrile (Table 1, Entry 3)**<sup>7</sup> Method A was followed using *o*-tolylboronic acid (204.5 mg, 1.5 mmol), 2-bromobutanenitrile (148 mg, 1.0 mmol), Ni(PPh<sub>3</sub>)<sub>4</sub> (110.8 mg, 0.1 mmol), K<sub>3</sub>PO<sub>4</sub> (424.6 mg, 2.0 mmol). The reaction mixture was purified by silica gel chromatography to afford 75% of the desired product. <sup>1</sup>H NMR (300 MHz, CDCl<sub>3</sub>) δ 7.40 – 7.25 (m, 1H), 7.23 – 7.03 (m, 3H), 3.80 (t, *J* = 7.9, 1H), 2.25 (s, 3H), 1.91 – 1.71 (m, 2H), 1.03 (t, *J* = 7.4 Hz, 3H); <sup>13</sup>C NMR (75 MHz, CDCl<sub>3</sub>) δ 135.16, 134.35, 130.10, 128.27, 127.69, 126.99, 121.31, 36.00, 28.06, 19.35, 12.07. MS (EI): 158.8, 129.9, 103.0, 77.0.

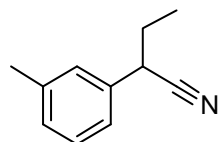

**2-*m*-tolylbutanenitrile (Table 1, Entry 4)** Method A was followed using *m*-tolylboronic acid (204.5 mg, 1.5 mmol), 2-bromobutanenitrile (148 mg, 1.0 mmol), Ni(PPh<sub>3</sub>)<sub>4</sub> (110.8 mg, 0.1 mmol), K<sub>3</sub>PO<sub>4</sub> (424.6 mg, 2.0 mmol). The reaction mixture was purified by silica gel chromatography to afford 81% of the desired product. <sup>1</sup>H NMR (300 MHz, CDCl<sub>3</sub>) δ 7.17 (t, *J* = 7.5 Hz, 1H), 7.06 – 7.02 (m, 3H), 3.61 (t, *J* = 7.2 Hz, 1H), 2.28 (s, 3H), 1.92 – 1.75 (m, 2H), 0.98 (t, *J* = 7.4 Hz, 3H); <sup>13</sup>C NMR (75 MHz, CDCl<sub>3</sub>) δ 136.48, 133.32, 126.52, 126.39, 125.61, 122.01, 118.57, 36.50, 26.90, 19.05, 9.21. MS (EI) *m/z*: 159.0, 130.1, 103.0, 91.2. HRMS (EI) calcd for C<sub>11</sub>H<sub>13</sub>N [M]<sup>+</sup>: 159.1048; found: 159.1046.

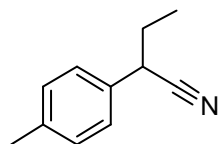

**2-*p*-tolylbutanenitrile (Table 1, Entry 5)**<sup>8</sup> Method A was followed using *p*-tolylboronic acid (204.5 mg, 1.5 mmol), 2-bromobutanenitrile (148 mg, 1.0 mmol), Ni(PPh<sub>3</sub>)<sub>4</sub> (110.8 mg, 0.1 mmol), K<sub>3</sub>PO<sub>4</sub> (424.6 mg, 2.0 mmol). The reaction mixture was purified by silica gel chromatography to afford 78% of the desired product. <sup>1</sup>H NMR (300 MHz, CDCl<sub>3</sub>) δ 7.14 – 7.08 (m, 4H), 3.61 (t, *J* = 7.2 Hz, 1H), 2.26 (s, 3H), 1.85 – 1.76 (m, 2H), 0.98 (t, *J* = 7.4 Hz, 3H); <sup>13</sup>C NMR (75 MHz, CDCl<sub>3</sub>) δ 138.01, 132.98, 129.89, 127.40, 121.20, 38.75, 29.47, 21.30, 11.73. MS (EI) *m/z*: 158.8, 130.0, 103.0, 77.0.

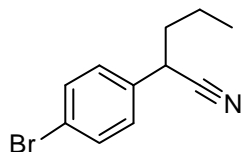

**2-(4-bromophenyl)pentanenitrile (Table 1, Entry 6)**<sup>9</sup> Method A was followed using 4-bromophenylboronic acid (301.2 mg, 1.5 mmol), 2-bromopentanenitrile (162.0 mg, 1.0 mmol), Ni(PPh<sub>3</sub>)<sub>4</sub> (110.8 mg, 0.1 mmol), K<sub>3</sub>PO<sub>4</sub> (424.6 mg, 2.0 mmol). The reaction mixture was purified by silica gel chromatography to afford 86% of the desired product. <sup>1</sup>H NMR (300 MHz, CDCl<sub>3</sub>) δ 7.42 (d, *J* = 8.4 Hz, 2H), 7.12 (d, *J* =

8.4 Hz, 2H), 3.67 (t,  $J = 8.3$  Hz, 1H), 1.91 – 1.63 (m, 2H), 1.49 – 1.28 (m, 2H), 0.87 (t,  $J = 7.3$  Hz, 3H);  $^{13}\text{C}$  NMR (75 MHz,  $\text{CDCl}_3$ )  $\delta$  135.27, 132.41, 129.18, 122.23, 120.63, 37.93, 36.89, 20.46, 13.64. MS (EI)  $m/z$ : 238.9, 237.0, 197.0, 195.1, 116.1. HRMS (EI) calcd for  $\text{C}_{11}\text{H}_{12}\text{BrN}$   $[\text{M}]^+$ : 237.0153; found: 237.0157.

**Table 2**

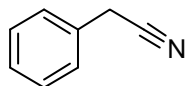

**2-phenylacetonitrile (Table 2, Entry 1)**<sup>5</sup> Method B was followed using  $\text{PhB}(\text{OH})_2$  (121.9 mg, 1.0 mmol), 2-bromoacetonitrile (60 mg, 0.5 mmol),  $\text{Ni}(\text{acac})_2$  (6.4 mg, 0.025 mmol),  $\text{PPh}_3$  (13.1 mg, 0.05 mmol) and  $\text{K}_3\text{PO}_4$  (636.9 mg, 3.0 mmol). The GC yield was 68%. MS (EI)  $m/z$ : 128.0, 117.0, 89.0, 45.1.

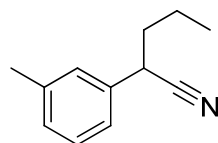

**2-*m*-tolylpentanenitrile (Table 2, Entry 2)** Method B was followed using *m*-tolylboronic acid (136.3 mg, 1.0 mmol), 2-bromopentanenitrile (81.0 mg, 0.5 mmol),  $\text{Ni}(\text{acac})_2$  (6.4 mg, 0.025 mmol),  $\text{PPh}_3$  (13.1 mg, 0.05 mmol) and  $\text{K}_3\text{PO}_4$  (636.9 mg, 3.0 mmol). The reaction mixture was purified by silica gel chromatography to afford 81% of the desired product.  $^1\text{H}$  NMR (300 MHz,  $\text{CDCl}_3$ )  $\delta$  7.41 – 6.95 (m, 4H), 3.66 (t,  $J = 8.5$ , 1H), 2.28 (s, 3H), 1.93 – 1.64 (m, 2H), 1.47 – 1.41 (m, 2H), 0.97 – 0.79 (m, 3H);  $^{13}\text{C}$  NMR (75 MHz,  $\text{CDCl}_3$ )  $\delta$  139.07, 136.18, 129.12, 128.94, 128.14, 124.54, 121.32, 38.16, 37.33, 21.64, 20.59, 13.70. MS (EI)  $m/z$ : 172.8, 131.0, 104.0, 91.1. HRMS (EI) calcd for  $\text{C}_{12}\text{H}_{15}\text{N}$   $[\text{M}]^+$ : 173.1204; found: 173.1198.

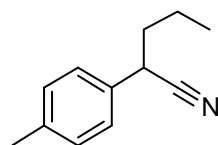

**2-*p*-tolylpentanenitrile (Table 2, Entry 3)**<sup>10</sup> Method B was followed using *p*-tolylboronic acid (136.3 mg, 1.0 mmol), 2-bromopentanenitrile (81.0 mg, 0.5

mmol), Ni(acac)<sub>2</sub> (6.4 mg, 0.025 mmol), PPh<sub>3</sub> (13.1 mg, 0.05 mmol) and K<sub>3</sub>PO<sub>4</sub> (636.9 mg, 3.0 mmol). The reaction mixture was purified by silica gel chromatography to afford 88% of the desired product. <sup>1</sup>H NMR (300 MHz, CDCl<sub>3</sub>) δ 7.11 (m, 4H), 3.66 (t, *J* = 8.3, 1H), 2.26 (s, 3H), 1.88 – 1.63 (m, 2H), 1.50 – 1.32 (m, 2H), 0.87 (t, *J* = 7.3 Hz, 3H); <sup>13</sup>C NMR (75 MHz, CDCl<sub>3</sub>) δ 137.97, 133.25, 129.90, 127.34, 121.35, 38.15, 36.99, 21.30, 20.52, 13.68. MS (EI) *m/z*: 173.0, 131.0, 116.1, 91.2, 77.2.

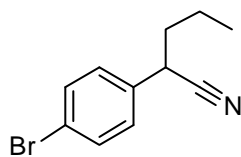

**2-(4-bromophenyl)pentanenitrile (Table 2, Entry 4)** Method B was followed using 4-bromophenylboronic acid (200.8 mg, 1.0 mmol), 2-bromopentanenitrile (81.0mg, 0.5 mmol), Ni(acac)<sub>2</sub> (6.4 mg, 0.025 mmol), PPh<sub>3</sub> (13.1 mg, 0.05 mmol) and K<sub>3</sub>PO<sub>4</sub> (636.9 mg, 3.0 mmol). The reaction mixture was purified by silica gel chromatography to afford 89% of the desired product. <sup>1</sup>H NMR (300 MHz, CDCl<sub>3</sub>) δ 7.42 (d, *J* = 8.4 Hz, 2H), 7.12 (d, *J* = 8.4 Hz, 2H), 3.67 (t, *J* = 8.3 Hz, 1H), 1.91 – 1.63 (m, 2H), 1.49 – 1.28 (m, 2H), 0.87 (t, *J* = 7.3 Hz, 3H); <sup>13</sup>C NMR (75 MHz, CDCl<sub>3</sub>) δ 135.27, 132.41, 129.18, 122.23, 120.63, 37.93, 36.89, 20.46, 13.64. MS (EI) *m/z*: 238.9, 237.0, 197.0, 195.1, 116.1. HRMS (EI) calcd for C<sub>11</sub>H<sub>12</sub>BrN [M]<sup>+</sup>: 237.0153; found: 237.0157.

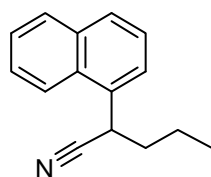

**2-(naphthalene-1-yl)pentanenitrile (Table 2, Entry 5)<sup>11</sup>** Method B was followed using naphthalene-1-ylboronic acid (172.0 mg, 1.0 mmol), 2-bromopentanenitrile (81.0 mg, 0.5 mmol), Ni(acac)<sub>2</sub> (6.4 mg, 0.025 mmol), PPh<sub>3</sub> (13.1 mg, 0.05 mmol) and K<sub>3</sub>PO<sub>4</sub> (636.9 mg, 3.0 mmol). The reaction mixture was purified by silica gel chromatography to afford 75% of the desired product. <sup>1</sup>H NMR (300 MHz, CDCl<sub>3</sub>) δ 7.83 – 7.55 (m, 4H), 7.41 - 7.37 (m, 2H), 7.27 (d, *J* = 8.5 Hz, 1H), 3.81 (t, *J* = 6.0 Hz,

1H), 1.85 – 1.76 (m, 2H), 1.45 – 1.38 (m, 2H), 0.84 (t,  $J = 7.3$  Hz, 3H);  $^{13}\text{C}$  NMR (75 MHz,  $\text{CDCl}_3$ )  $\delta$  133.54, 133.01, 129.26, 128.08, 127.98, 126.94, 126.69, 126.52, 125.08, 121.23, 37.98, 37.53, 20.59, 13.72. MS (EI)  $m/z$ : 209.0, 166.2, 139.2, 115.2.

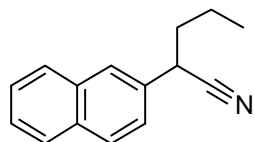

**2-(naphthalen-2-yl)pentanenitrile (Table 2, Entry 6)** Method B was followed using naphthalene-2-ylboronic acid (172.0 mg, 1.0 mmol), 2-bromopentanenitrile (81.0 mg, 0.5 mmol),  $\text{Ni}(\text{acac})_2$  (6.4 mg, 0.025 mmol),  $\text{PPh}_3$  (13.1 mg, 0.05 mmol) and  $\text{K}_3\text{PO}_4$  (636.9 mg, 3.0 mmol). The reaction mixture was purified by silica gel chromatography to afford 86% of the desired product.  $^1\text{H}$  NMR (300 MHz,  $\text{CDCl}_3$ )  $\delta$  7.71 – 7.66 (m, 4H), 7.37 – 7.34 (m, 2H), 7.26 – 7.23 (m, 1H), 3.78 (t,  $J = 8.5$  Hz, 1H), 1.82 – 1.75 (m, 2H), 1.52 – 1.26 (m, 2H), 0.82 (t,  $J = 7.3$  Hz, 3H);  $^{13}\text{C}$  NMR (75 MHz,  $\text{CDCl}_3$ )  $\delta$  133.56, 133.01, 129.26, 128.09, 127.99, 126.95, 126.70, 126.52, 125.09, 121.25, 37.97, 37.52, 20.60, 13.73. MS (EI)  $m/z$ : 209.0, 167.2, 139.2, 115.2. HRMS (EI) calcd for  $\text{C}_{15}\text{H}_{15}\text{N}$   $[\text{M}]^+$ : 209.1204; found: 209.1210.

**Table 3**

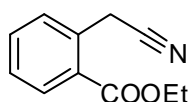

**Ethyl 2-(cyanomethyl)benzoate (Table 3, Entry 1)**<sup>12</sup> Method B was followed using ethyl 2-(5,5-dimethyl-1,3,2-dioxabotinan-2-yl)benzoate (262.1 mg, 1.0 mmol), 2-bromoacetonitrile (60.0 mg, 0.5 mmol),  $\text{Ni}(\text{acac})_2$  (6.4 mg, 0.025 mmol),  $\text{PPh}_3$  (13.1 mg, 0.05 mmol) and  $\text{K}_3\text{PO}_4$  (636.9 mg, 3.0 mmol). The reaction mixture was purified by silica gel chromatography to afford 63% of the desired product.  $^1\text{H}$  NMR (300 MHz,  $\text{CDCl}_3$ )  $\delta$  8.08 (d,  $J = 7.7$  Hz, 1H), 7.57 (d,  $J = 4.0$  Hz, 2H), 7.44 (dd,  $J = 8.0, 4.0$  Hz, 1H), 4.39 (q,  $J = 7.1$  Hz, 2H), 4.23 (s, 2H), 1.42 (t,  $J = 7.1$  Hz, 3H).  $^{13}\text{C}$  NMR (75 MHz,  $\text{CDCl}_3$ )  $\delta$  166.54, 133.25, 132.14, 131.75, 130.38, 128.85, 128.55, 118.23, 61.65, 23.48, 14.47. MS (EI)  $m/z$ : 188.9, 161.1, 144.5, 133.1, 116.1, 89.0.



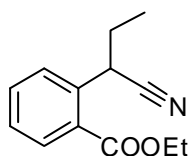

**Ethyl 2-(1-cyanopropyl)benzoate (Table 3, Entry 2)** Method B was followed using ethyl 2-(5,5-dimethyl-1,3,2-dioxaborinan-2-yl)benzoate (262.1 mg, 1.0 mmol), 2-bromobutanenitrile (74.0 mg, 0.5 mmol), Ni(acac)<sub>2</sub> (6.4 mg, 0.025 mmol), PPh<sub>3</sub> (13.1 mg, 0.05 mmol) and K<sub>3</sub>PO<sub>4</sub> (636.9 mg, 3.0 mmol). The reaction mixture was purified by silica gel chromatography to afford 95% of the desired product. <sup>1</sup>H NMR (300 MHz, CDCl<sub>3</sub>) δ 7.94 (d, *J* = 7.8 Hz, 1H), 7.59 (d, *J* = 7.7 Hz, 1H), 7.49 (t, *J* = 7.5 Hz, 1H), 7.31 (t, *J* = 7.5 Hz, 1H), 4.98 (dd, *J* = 8.9, 5.1 Hz, 1H), 4.29 (q, *J* = 7.1 Hz, 2H), 2.00 – 1.70 (m, 2H), 1.33 (t, *J* = 7.1 Hz, 3H), 1.07 (t, *J* = 7.3 Hz, 3H); <sup>13</sup>C NMR (75 MHz, CDCl<sub>3</sub>) δ 166.75, 138.09, 133.07, 131.62, 129.21, 128.25, 128.13, 121.58, 61.60, 35.90, 29.71, 14.46, 12.09. MS (EI) *m/z*: 217.1, 202.1, 174.1, 156.0, 115.1. HRMS (EI) calcd for C<sub>13</sub>H<sub>15</sub>NO<sub>2</sub> [M]<sup>+</sup>: 217.1103; found: 217.1105.

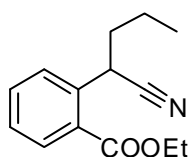

**Ethyl 2-(1-cyanobutyl)benzoate (Table 3, Entry 3)** Method B was followed using ethyl 2-(5,5-dimethyl-1,3,2-dioxaborinan-2-yl)benzoate (262.1 mg, 1.0 mmol), 2-bromopentanenitrile (81.0 mg, 0.5 mmol), Ni(acac)<sub>2</sub> (6.4 mg, 0.025 mmol), PPh<sub>3</sub> (13.1 mg, 0.05 mmol) and K<sub>3</sub>PO<sub>4</sub> (636.9 mg, 3.0 mmol). The reaction mixture was purified by silica gel chromatography to afford 87% of the desired product. <sup>1</sup>H NMR (300 MHz, CDCl<sub>3</sub>) δ 8.01 (d, *J* = 7.8 Hz, 1H), 7.68 (d, *J* = 7.7 Hz, 1H), 7.57 (t, *J* = 7.4 Hz, 1H), 7.39 (t, *J* = 7.5 Hz, 1H), 5.12 (dd, *J* = 8.1, 6.3 Hz, 1H), 4.37 (q, *J* = 7.1 Hz, 2H), 1.98 – 1.75 (m, 2H), 1.66 – 1.57 (m, 2H), 1.41 (t, *J* = 7.1 Hz, 3H), 0.98 (t, *J* = 7.3 Hz, 3H); <sup>13</sup>C NMR (75 MHz, CDCl<sub>3</sub>) δ 166.77, 138.37, 133.11, 131.57, 129.20, 128.22, 128.08, 121.73, 61.61, 38.31, 34.18, 20.98, 14.47, 13.69. MS (EI) *m/z*: 232.0, 202.0, 174.1, 156.1. HRMS (EI) calcd for C<sub>14</sub>H<sub>17</sub>NO<sub>2</sub> [M]<sup>+</sup>: 231.1259; found: 231.1256.

## 5. References

- (1) Boschi, F.; Camps, P.; Comes-Franchini, M.; Munoz-Torrero, D.; Ricci, A.; Sanchez, L. *Tetrahedron: Asymmetry* **2005**, *16*, 3739.
- (2) Yamazaki, H.; Harada, H.; Matsuzaki, K.; Yoshioka, K.; Takase, M.; Ohki, E. *Chem. Pharm. Bull.* **1987**, *35*, 2243.
- (3) Stevens, C. L.; Holland, W. *J. Org. Chem.* **1953**, *18*, 1112.
- (4) Kristensen, J. L.; Lysen, M.; Vedso, P.; Begtrup, M. *Org. Synth.* **2005**, *81*, 134.
- (5) Shapiro, M. J. *J. Org. Chem.* **1976**, *41*, 3197.
- (6) Gaspar, B.; Carreira, E. M. *Angew. Chem., Int. Ed.* **2007**, *46*, 4519.
- (7) Hartung, I.; Ince, S.; Ketschau, G.; Thierauch, K.-H.; Briem, H.; Ter Laak, A. M.; Lienau, P. **2007**, 2007-EP5431  
2007144203, 112pp.
- (8) Kosjek, B.; Fleitz, F. J.; Dormer, P. G.; Kuethe, J. T.; Devine, P. N. *Tetrahedron Asymmetry* **2008**, *19*, 1403.
- (9) Arseniyadis, S.; Kyler, K. S.; Watt, D. S. *Organic Reactions (Hoboken, NJ, United States)* **1984**, *31*, No pp given.
- (10) Murugan, E.; Gopinath, P. *J. Polym. Sci., Part A Polym. Chem.* **2009**, *47*, 771.
- (11) Mathe-Allainmat, M.; Le Gall, M.; Jellimann, C.; Andrieux, J.; Langlois, M. *Bioorg. Med. Chem.* **1999**, *7*, 2945.
- (12) Canepa, A. S.; Bravo, R. D. *Synth. Commun.* **2004**, *34*, 579.

## 6. NMR Spectra for New Compounds

### NMR spectra for Table 1, Entry 2

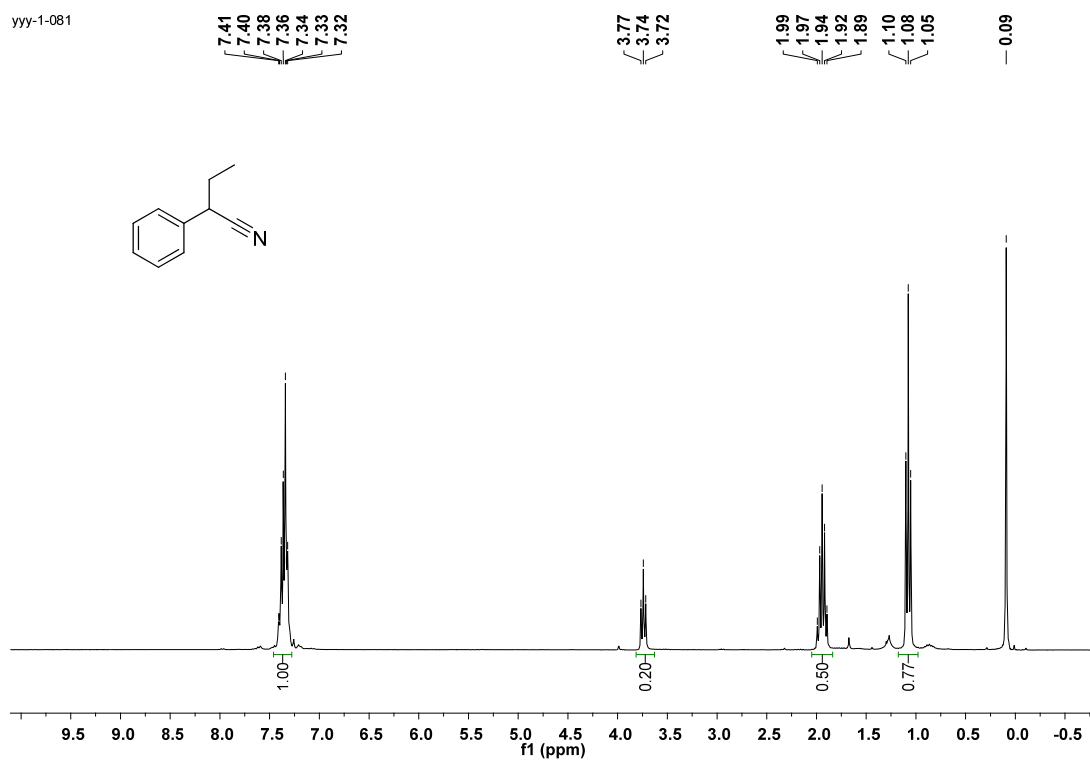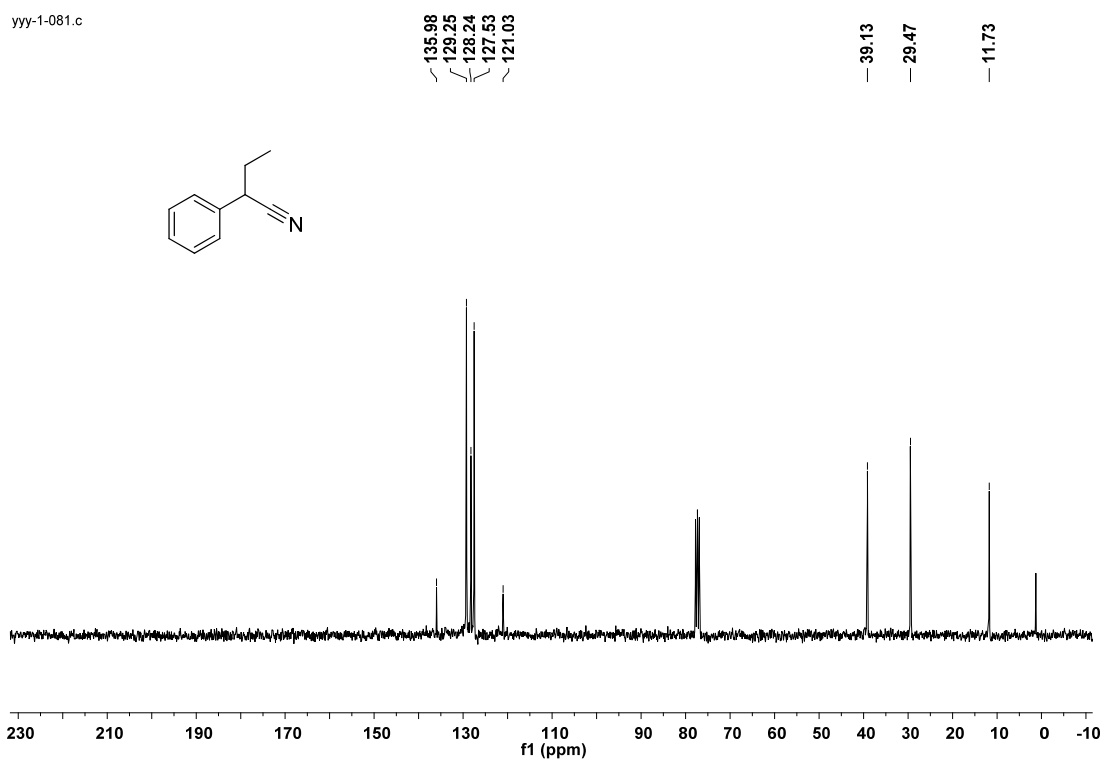

Supplementary Material (ESI) for Organic & Biomolecular Chemistry  
This journal is © The Royal Society of Chemistry 2011

### NMR spectra for Table 1, Entry 3

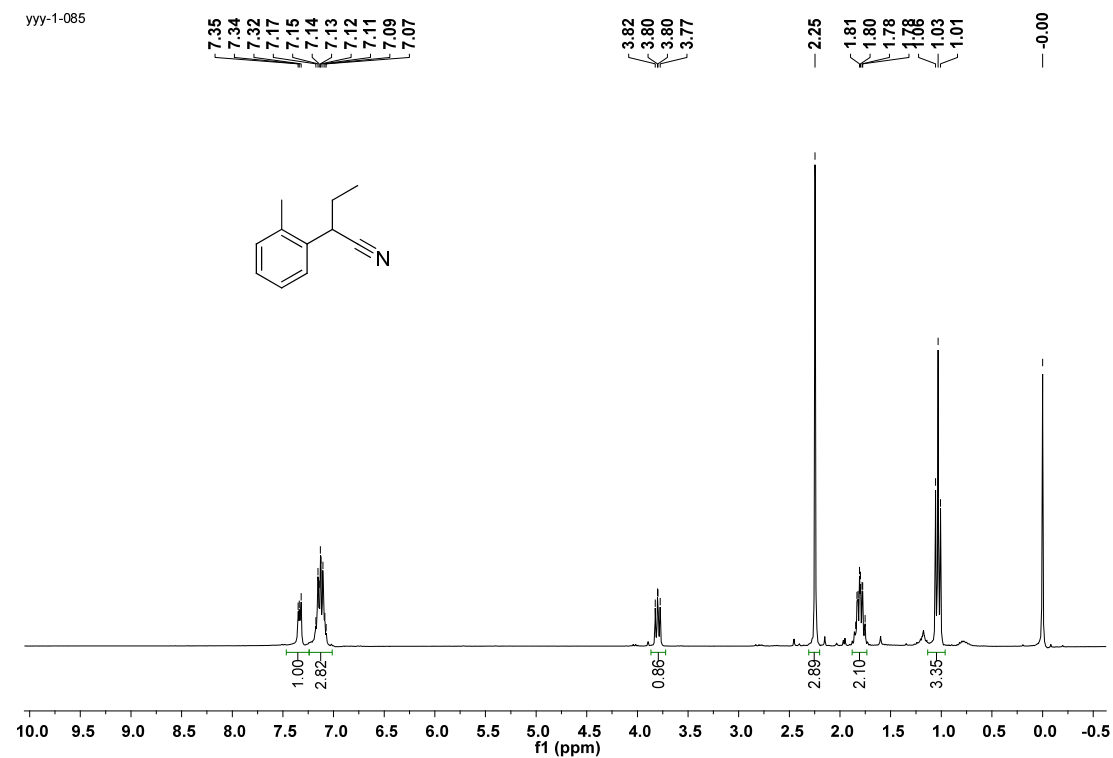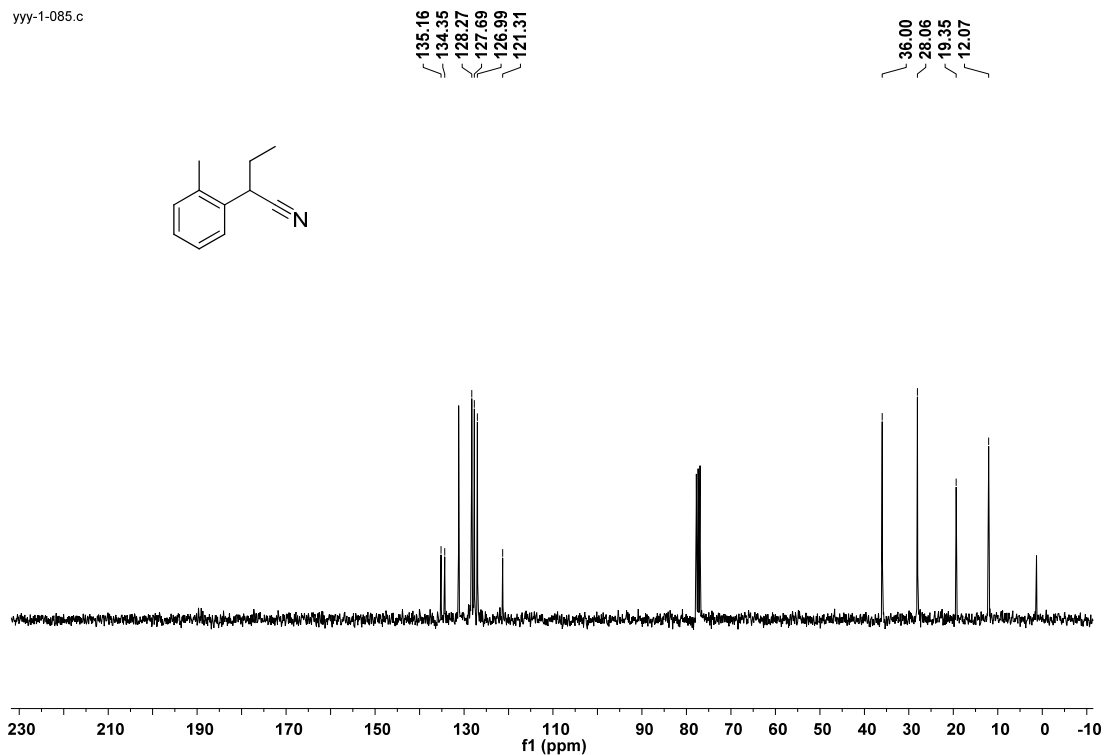

Supplementary Material (ESI) for Organic & Biomolecular Chemistry  
This journal is © The Royal Society of Chemistry 2011

### NMR spectra for **Table 1, Entry 4**

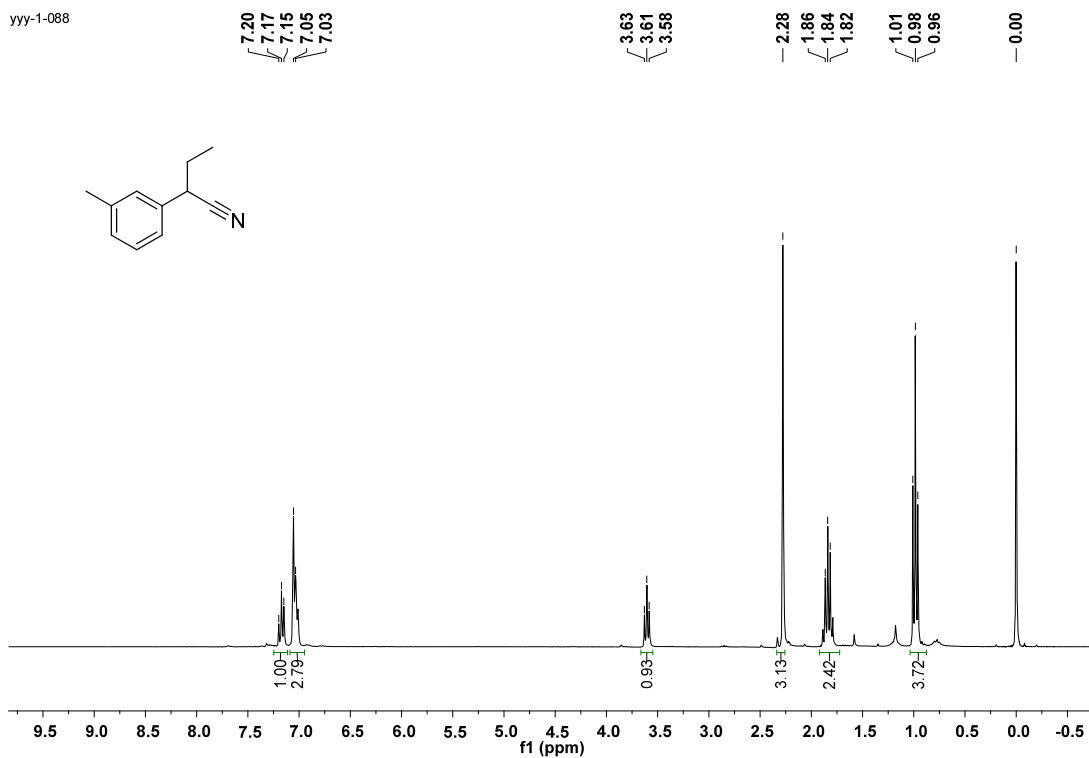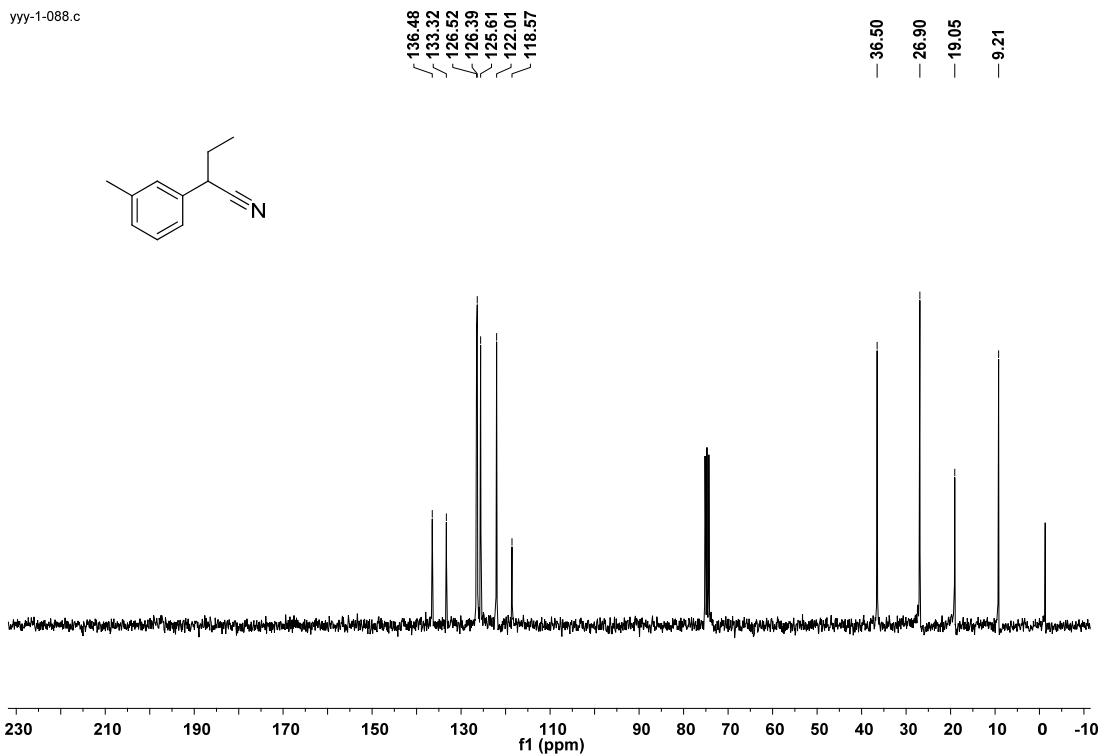

Supplementary Material (ESI) for Organic & Biomolecular Chemistry  
This journal is © The Royal Society of Chemistry 2011

## NMR spectra for Table 1, Entry 5

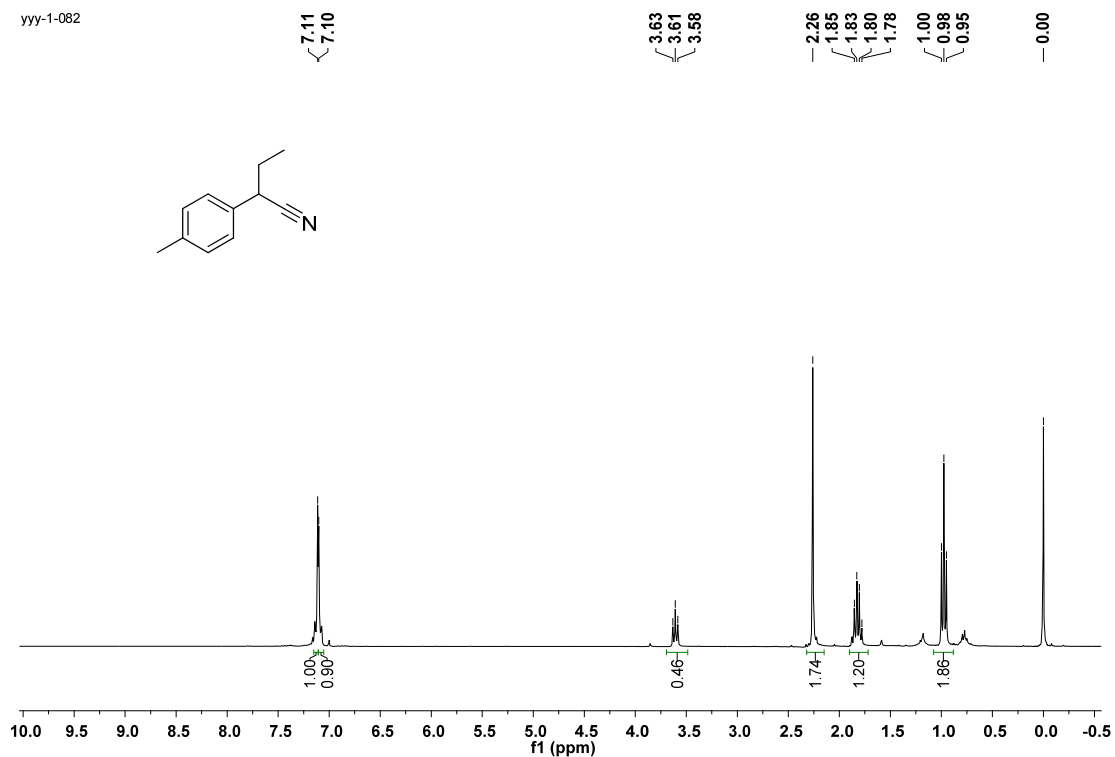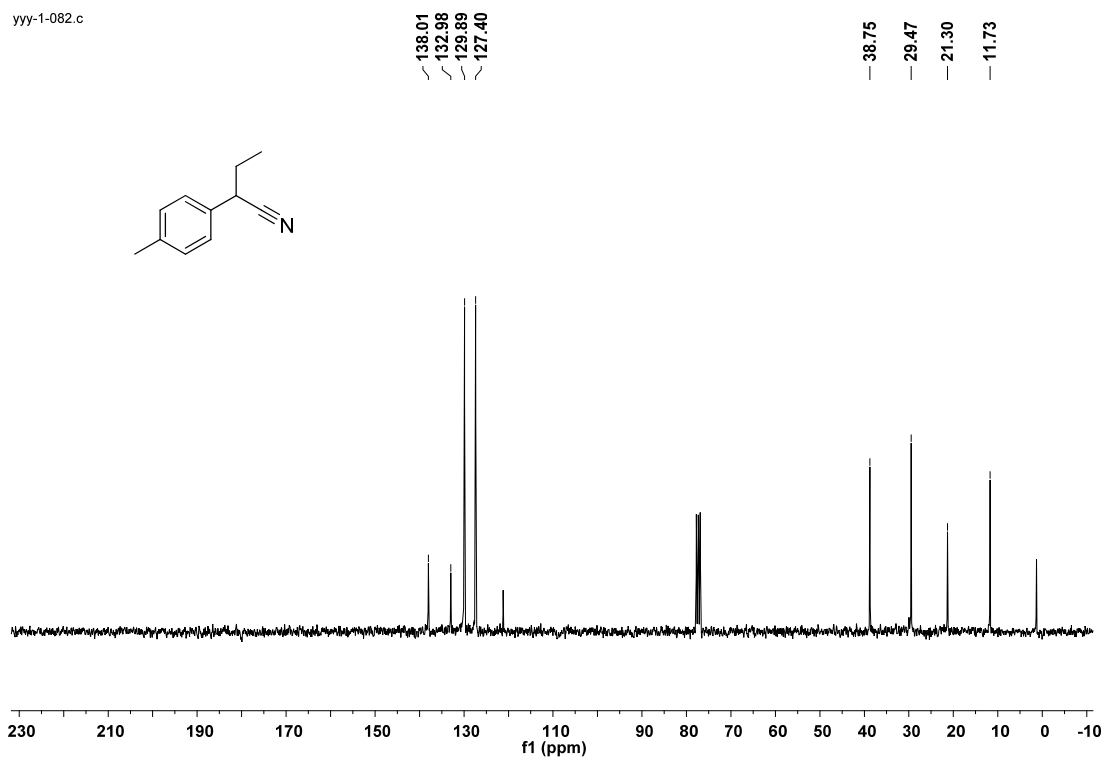

Supplementary Material (ESI) for Organic & Biomolecular Chemistry  
This journal is © The Royal Society of Chemistry 2011

NMR spectra for **Table 1, Entry 6** and **Table 2, Entry 5**

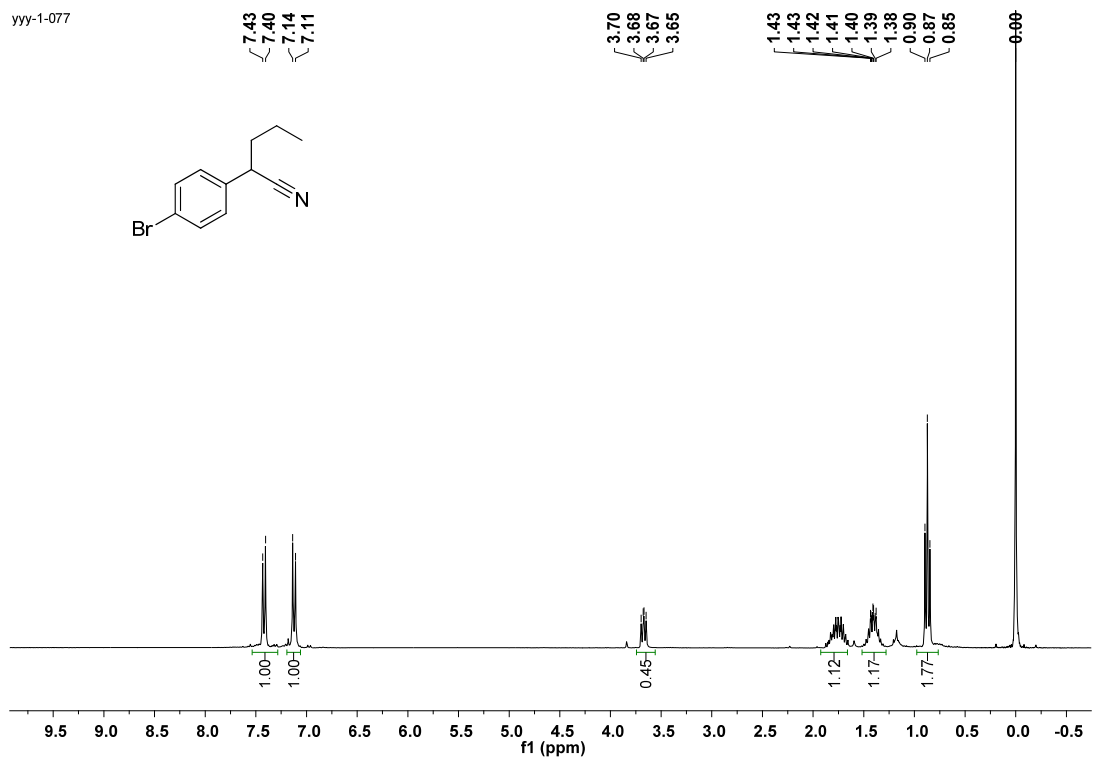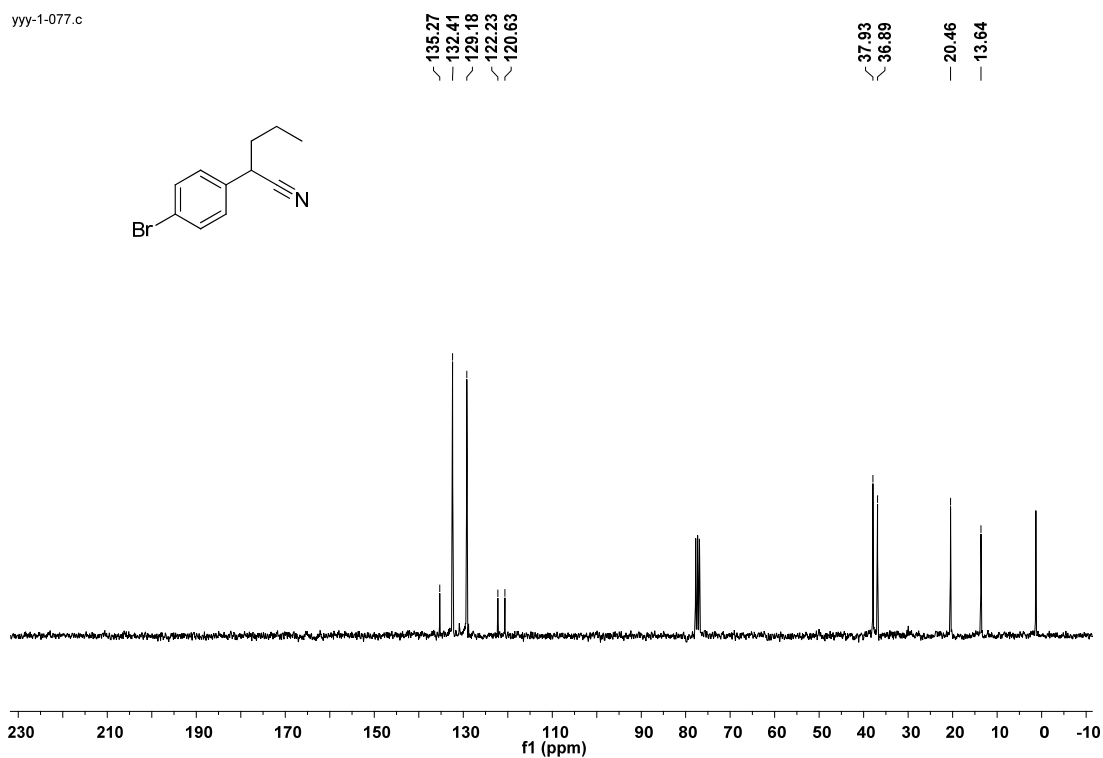

Supplementary Material (ESI) for Organic & Biomolecular Chemistry  
This journal is © The Royal Society of Chemistry 2011

## NMR spectra for Table 2, Entry 2

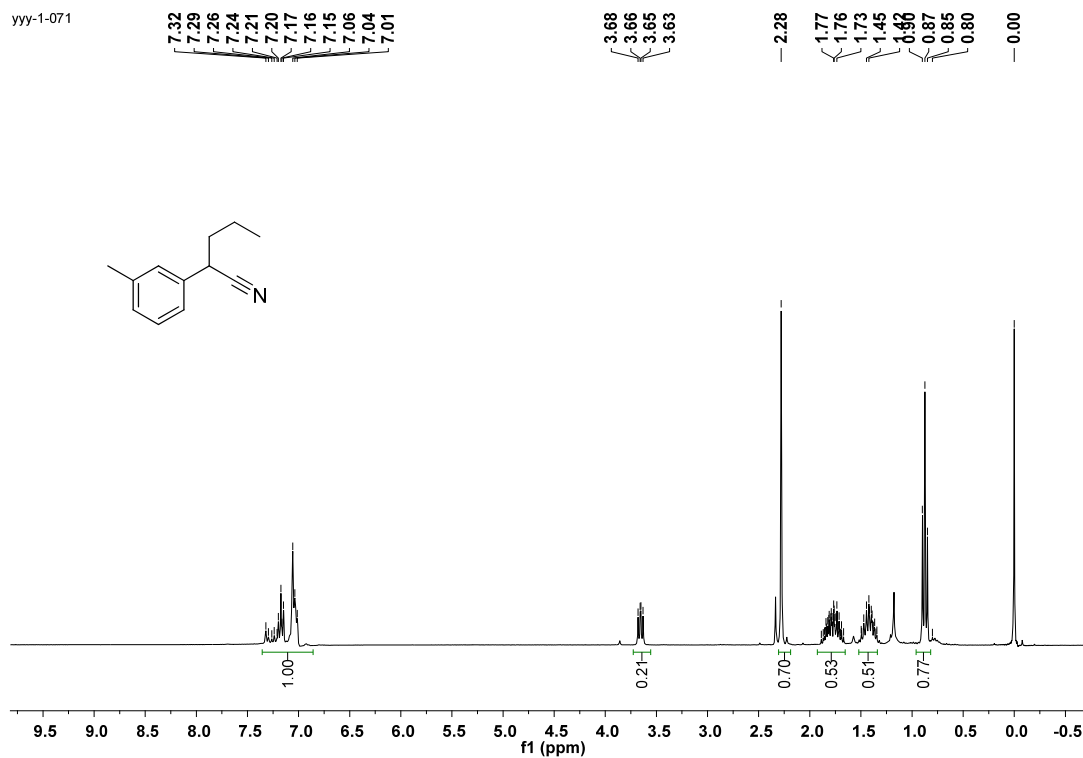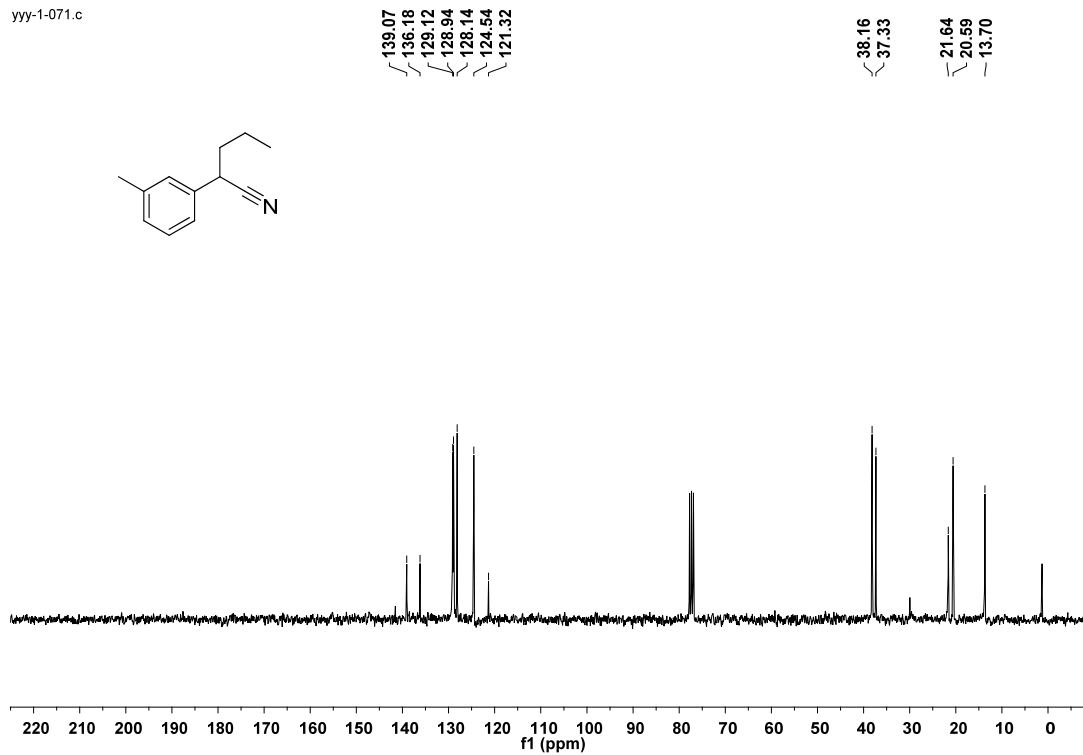



Supplementary Material (ESI) for Organic & Biomolecular Chemistry  
This journal is © The Royal Society of Chemistry 2011

### NMR spectra for Table 2, Entry 3

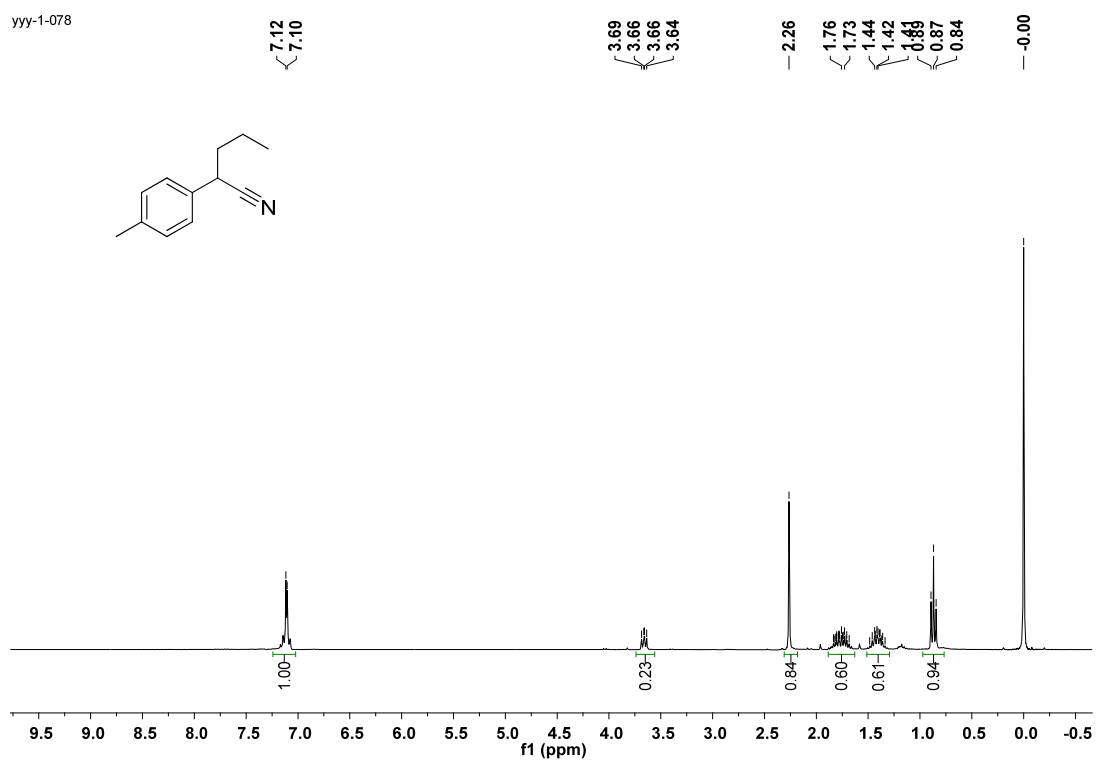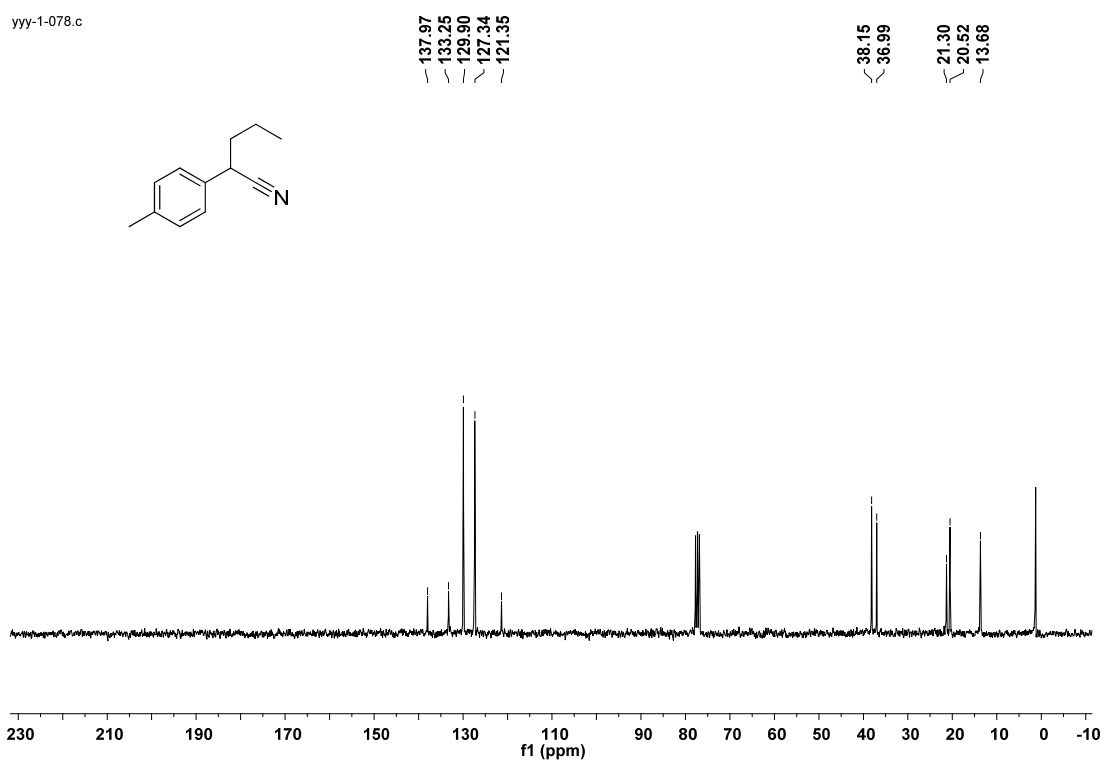

Supplementary Material (ESI) for Organic & Biomolecular Chemistry  
This journal is © The Royal Society of Chemistry 2011

### NMR spectra for Table 2, Entry 5

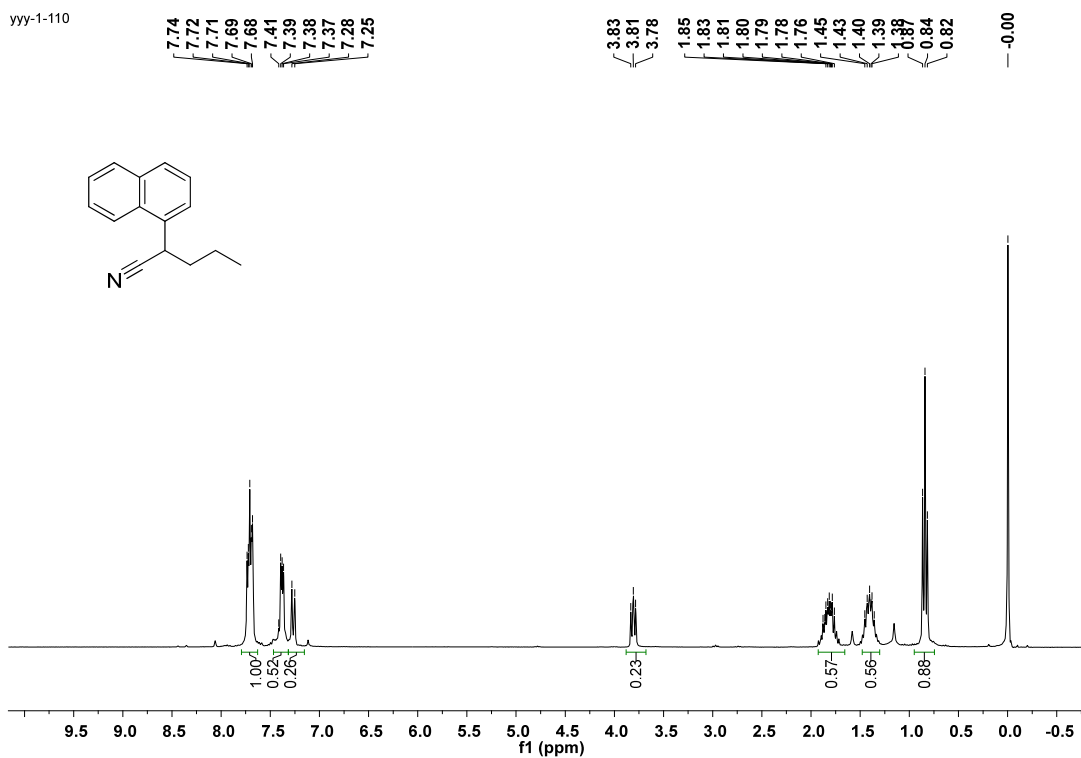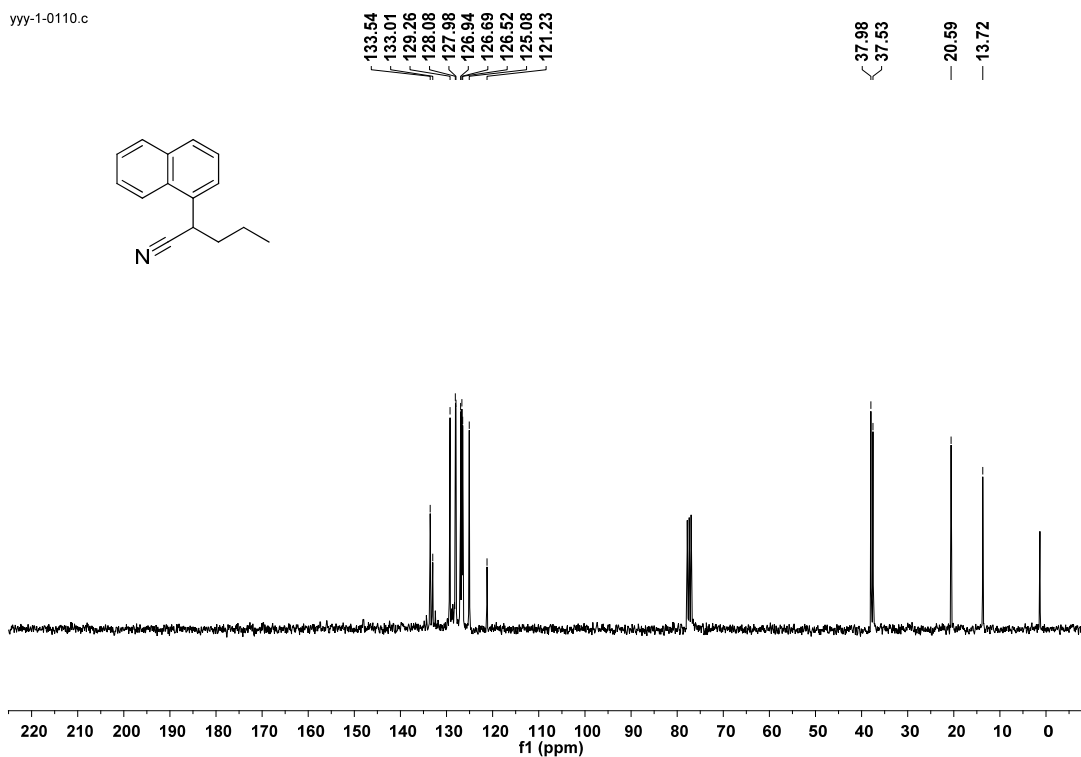

Supplementary Material (ESI) for Organic & Biomolecular Chemistry  
This journal is © The Royal Society of Chemistry 2011

### NMR spectra for Table 2, Entry 6

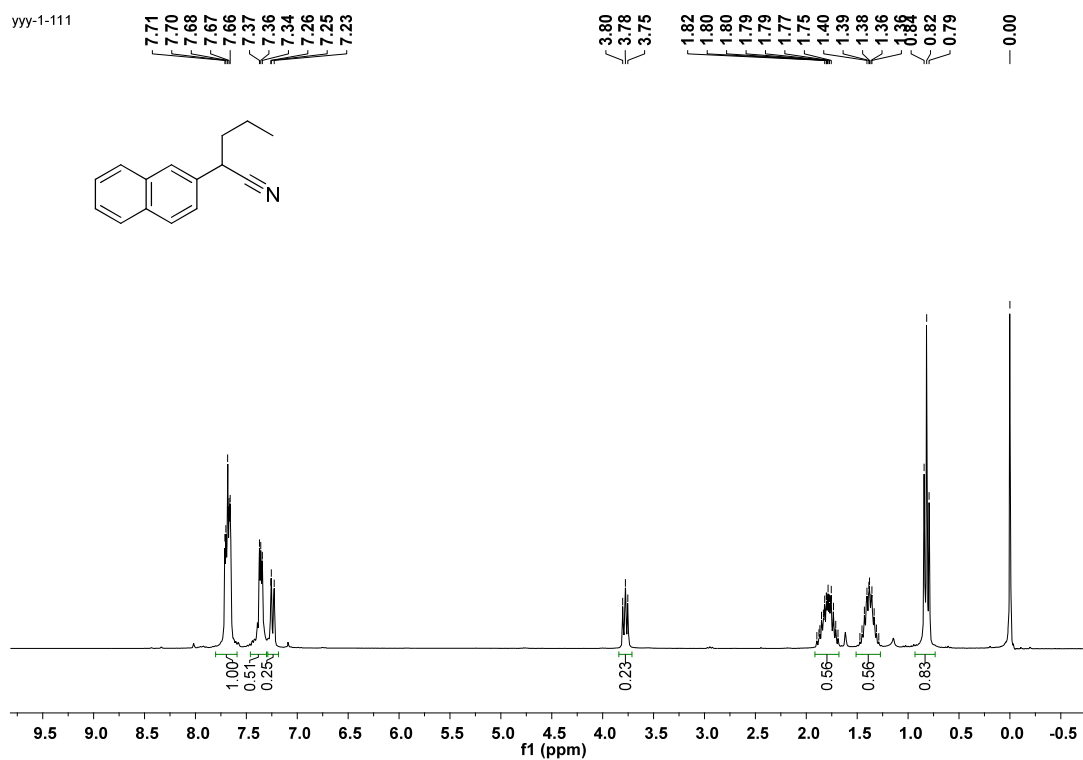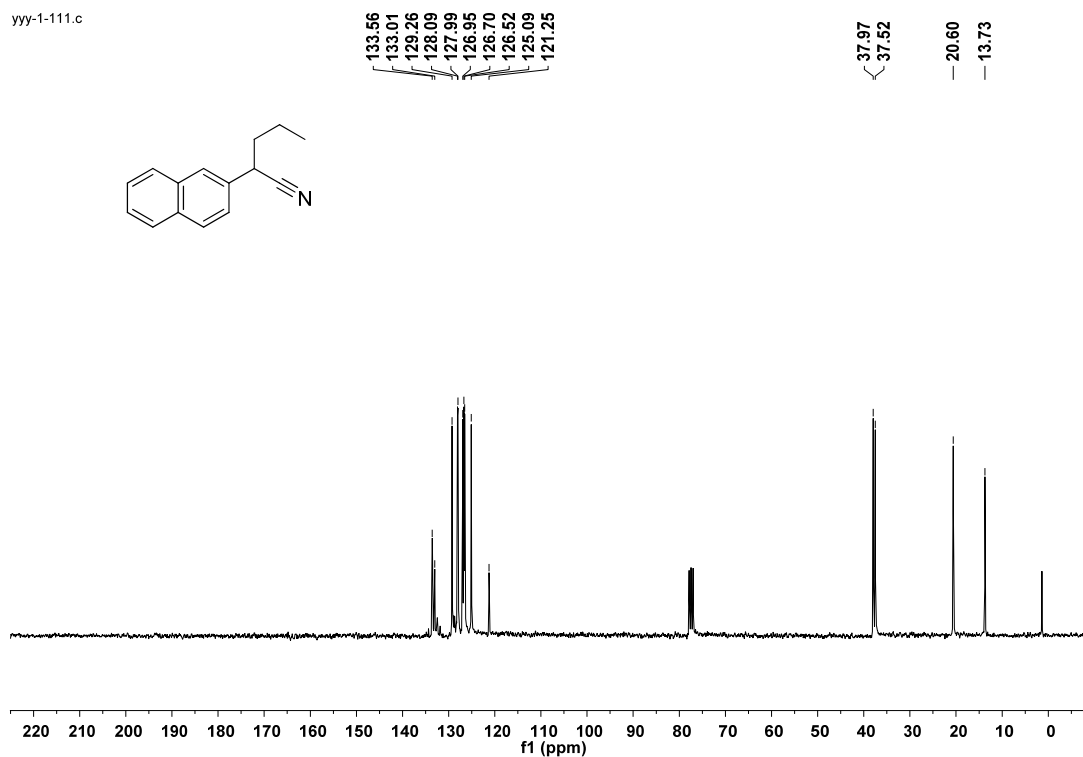

Supplementary Material (ESI) for Organic & Biomolecular Chemistry  
This journal is © The Royal Society of Chemistry 2011

### NMR spectra for Table 3, Entry 1

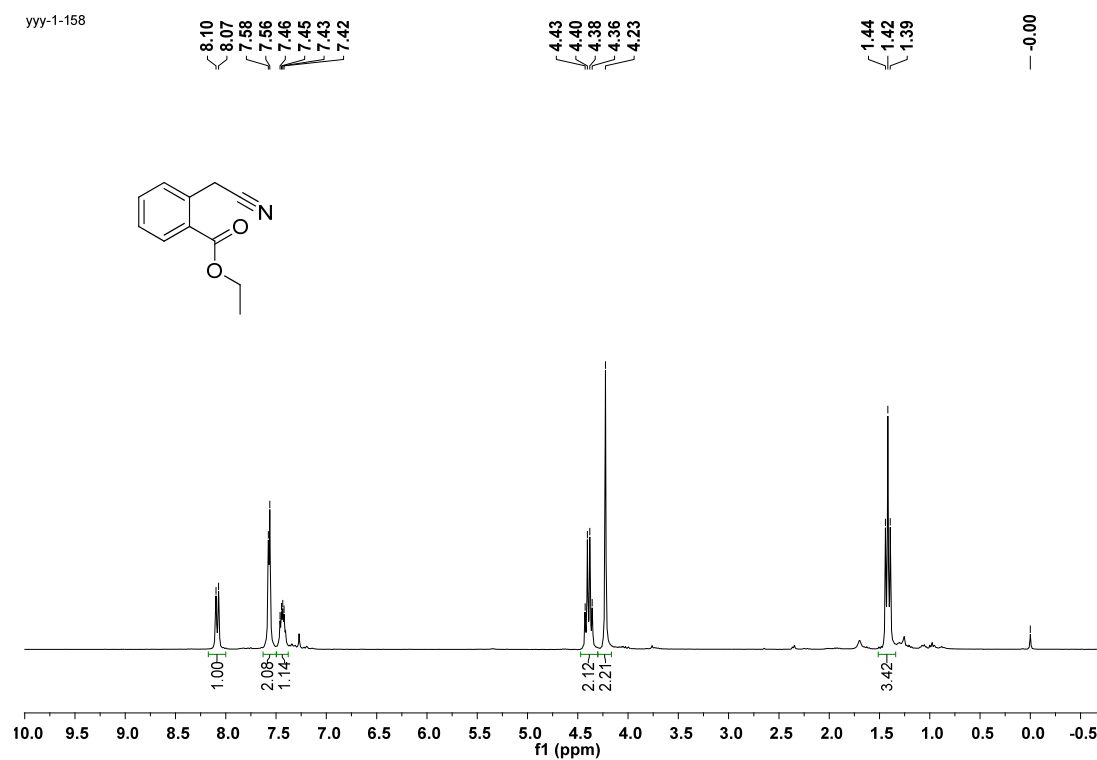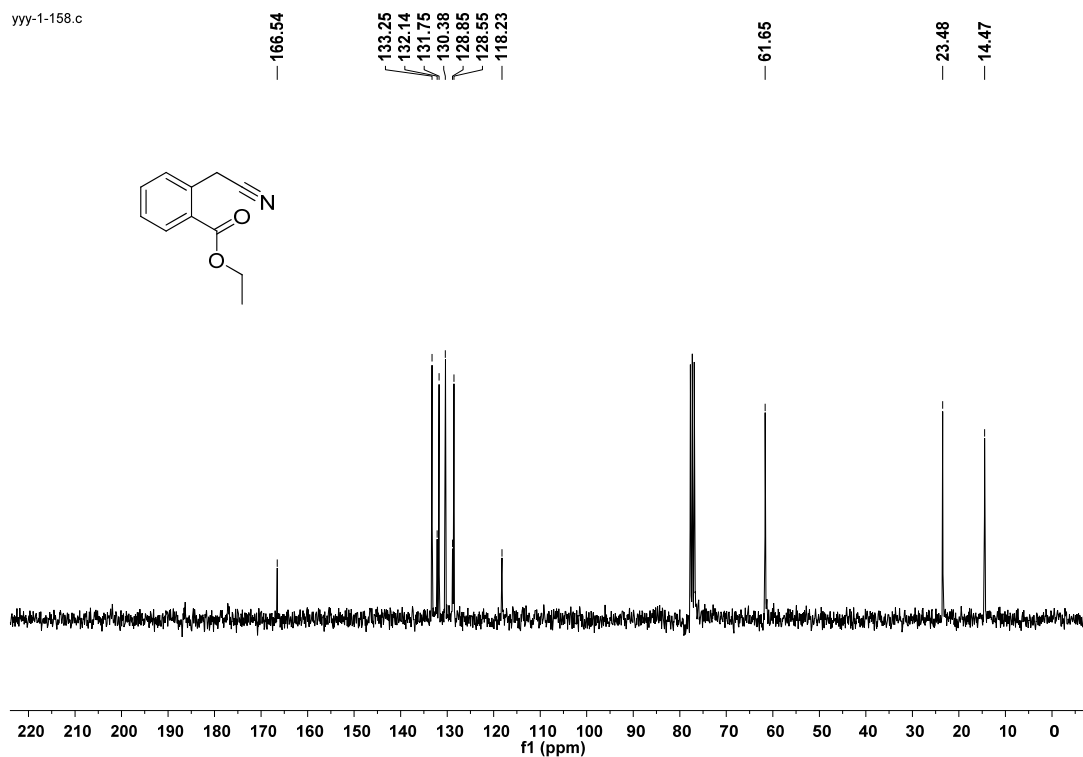

Supplementary Material (ESI) for Organic & Biomolecular Chemistry  
This journal is © The Royal Society of Chemistry 2011

## NMR spectra for Table 3, Entry 2

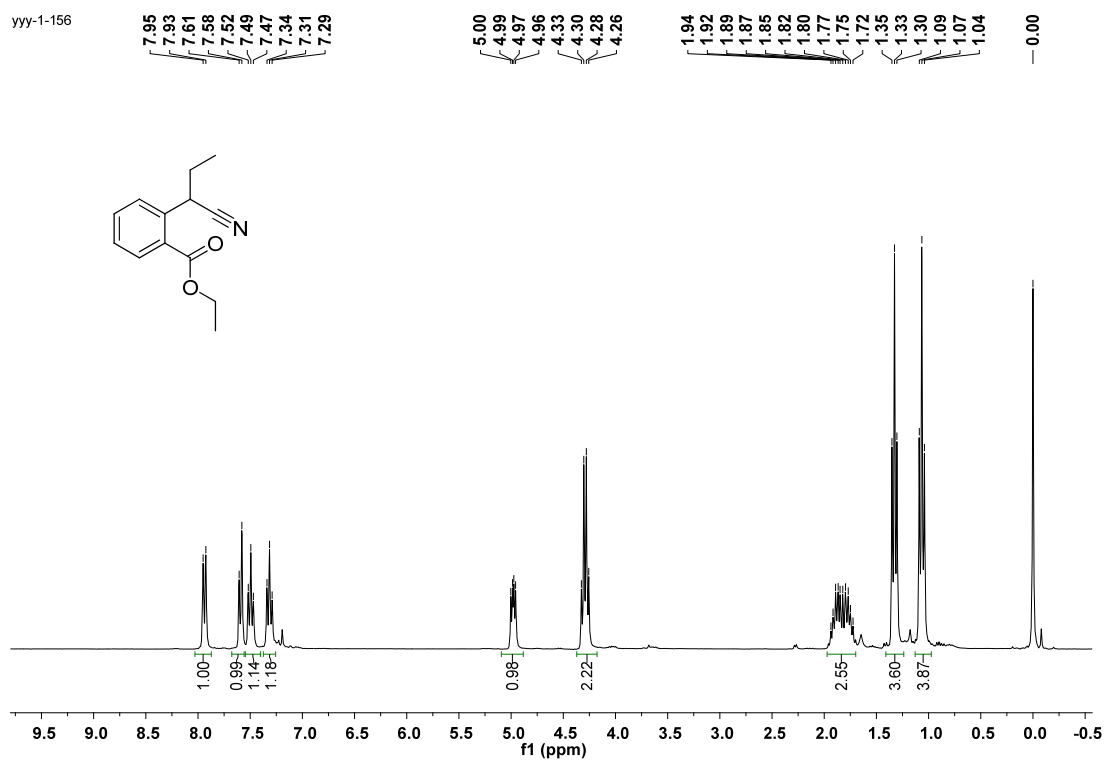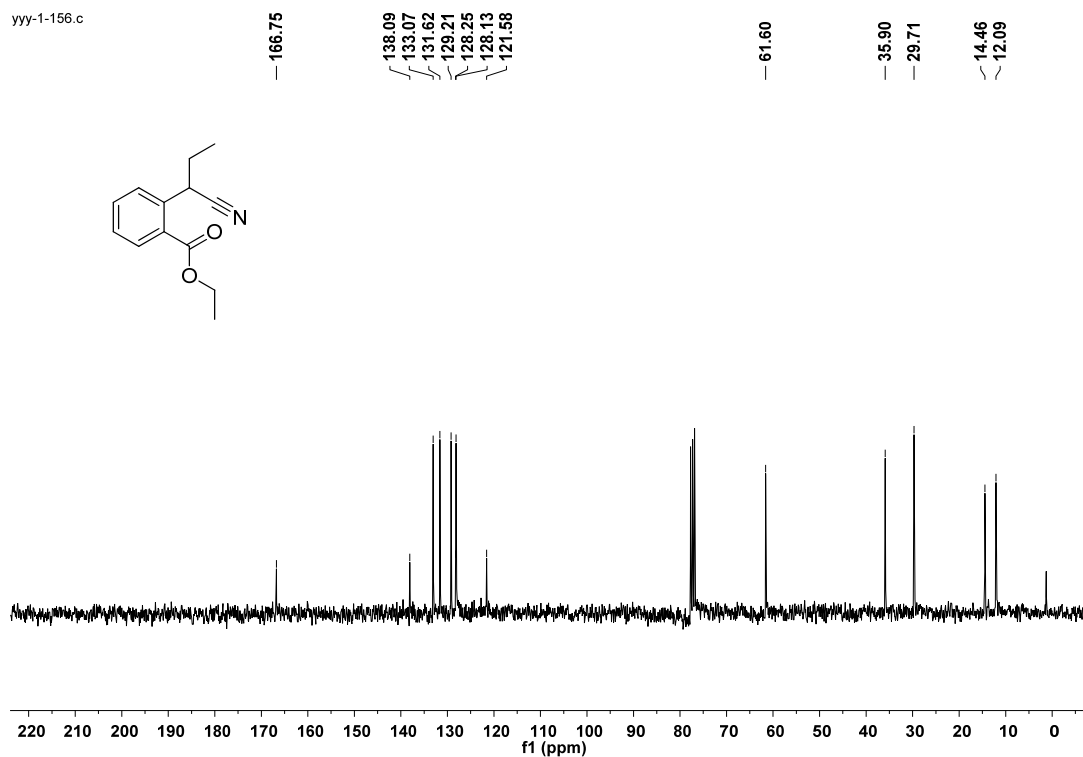

Supplementary Material (ESI) for Organic & Biomolecular Chemistry  
This journal is © The Royal Society of Chemistry 2011

### NMR spectra for Table 3, Entry 3

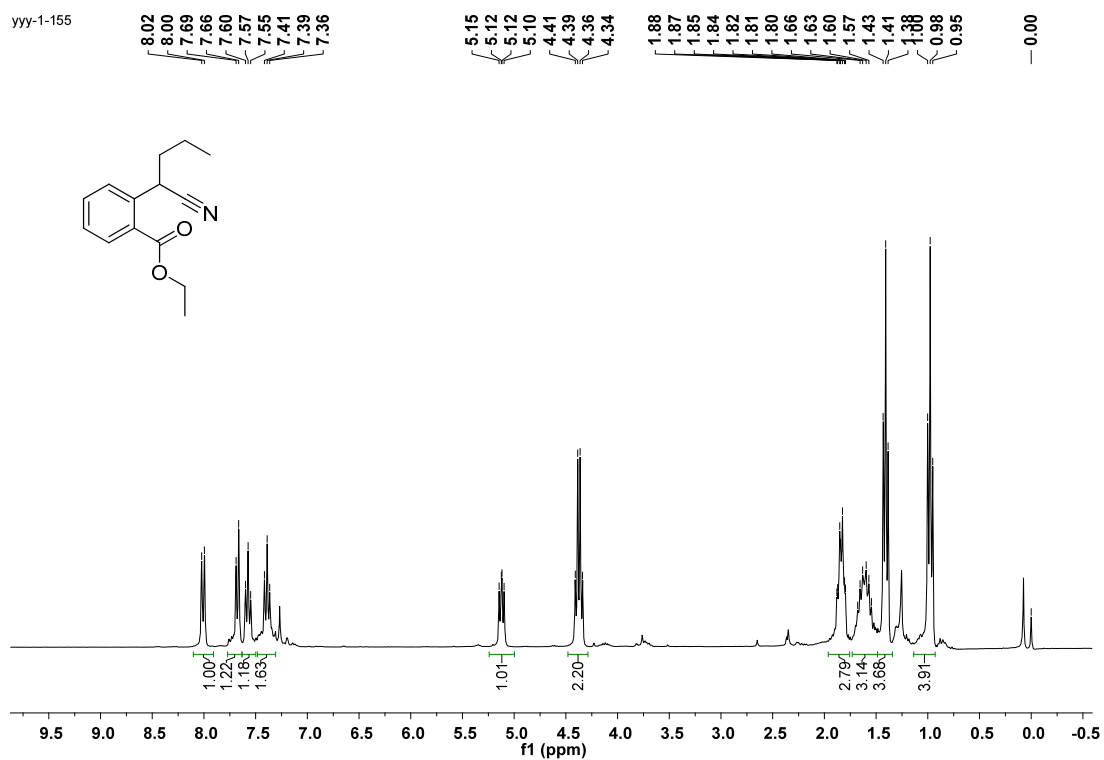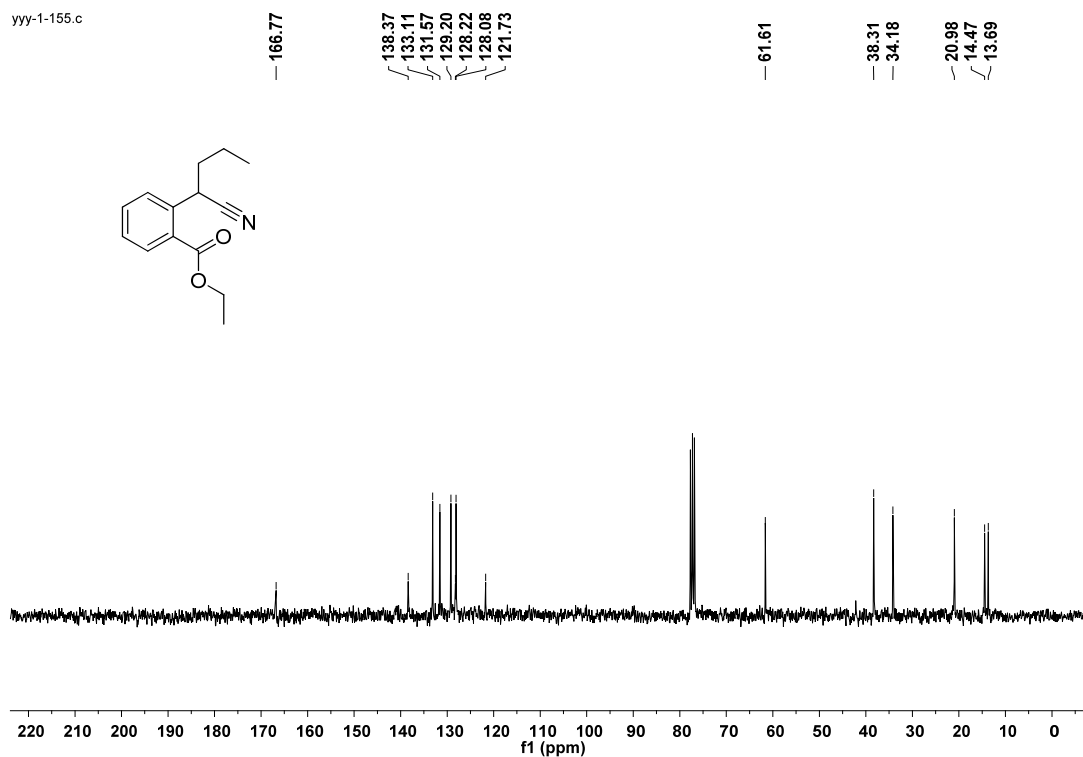

Supplement: c1ob05326d.pdf [file c1ob05326d.pdf]
